# Supplementary material
Source: MDPI journal article supplement (https://www.mdpi.com/1996-1073/13/10/2494)
Supplement: s1 [file s1]

Supplementary Materials

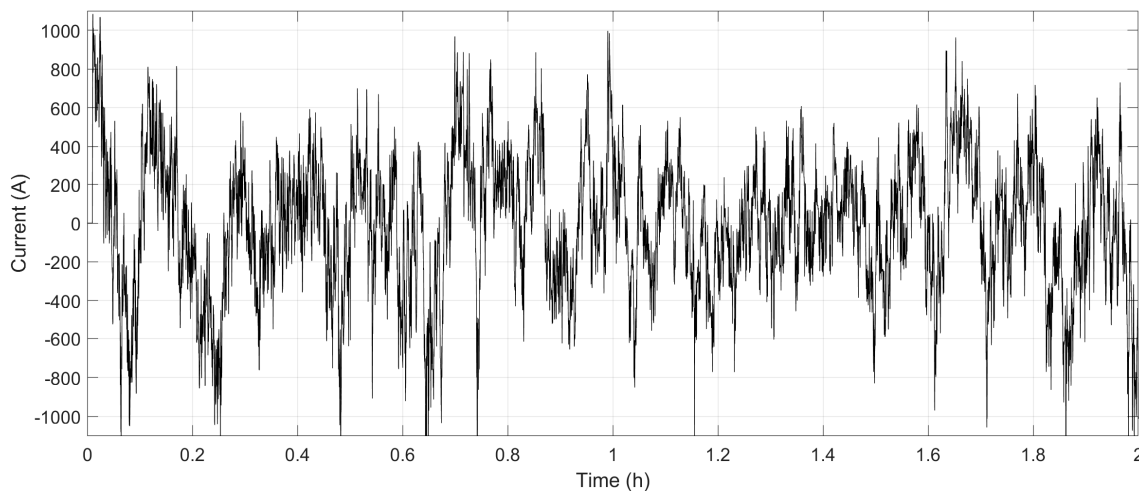

Figure S1. Frequency regulation schedule from the 1MW system.

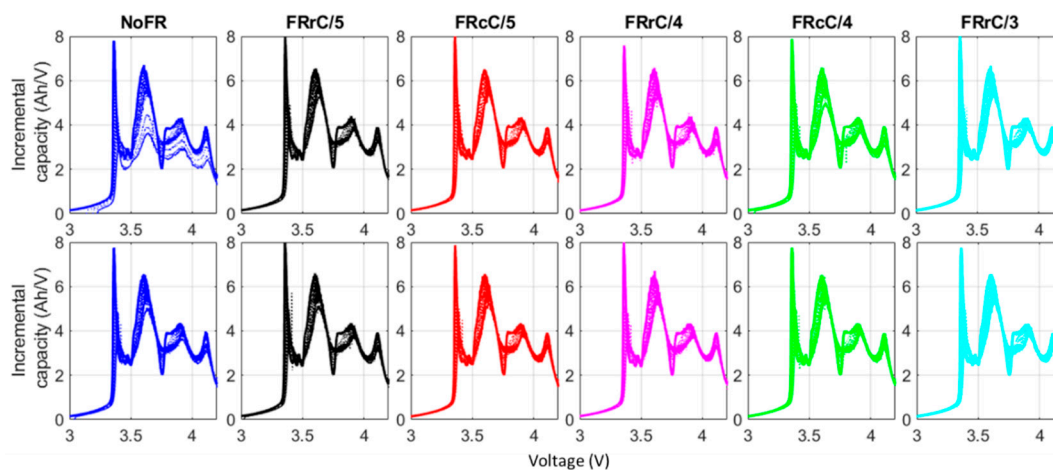

Figure S2. IC signatures for all the cells throughout the experiment.

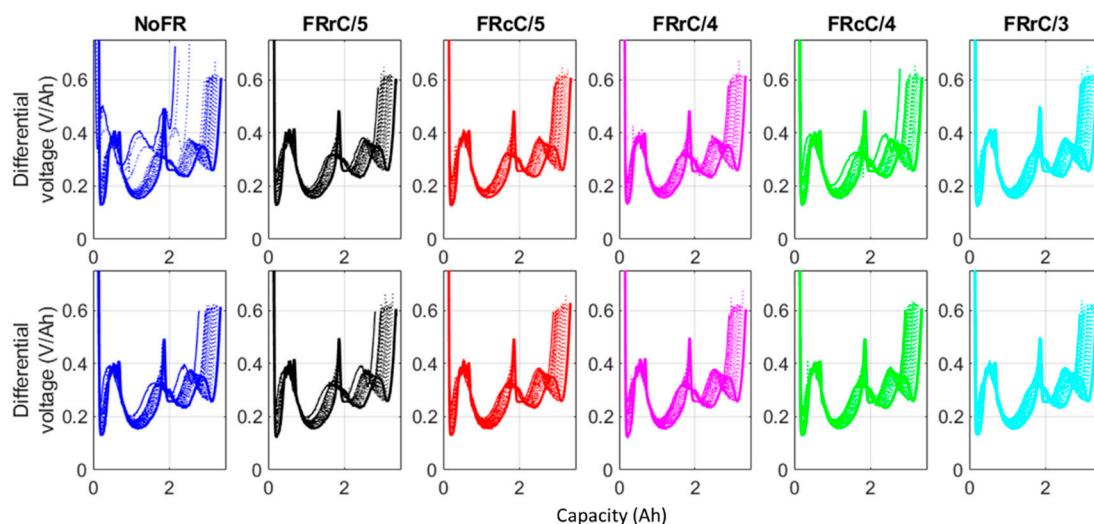

**Figure S3.** Differential voltage (DV) signatures for all the cells throughout the experiment.

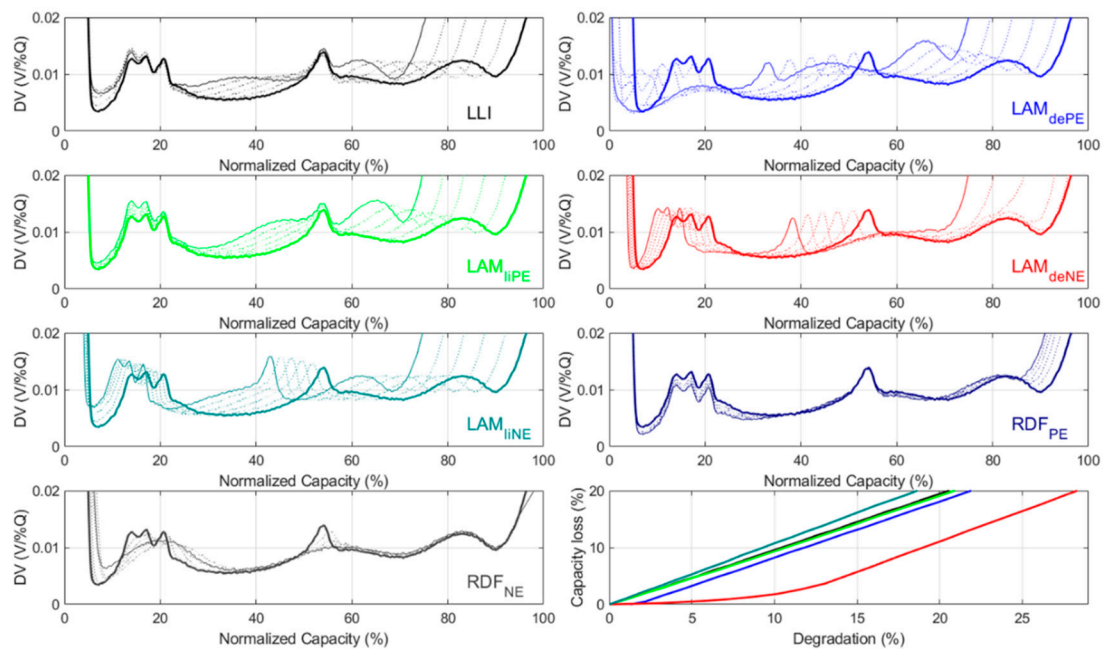

**Figure S4.** DV degradation map.
